# Supplementary material for: Effects of 1,2-ethanedithiol concentration on performance improvement of quantum-dot LEDs
Source: Royal Society of Chemistry journal article supplement (doi:10.1039/c9ra08411h), 2019-01-01
Supplement: c9ra08411h1.pdf [file c9ra08411h1.pdf]

## Supporting Information

### Effects of 1,2-Ethanedithiol Concentration on Performance Improvement of Quantum-Dot LEDs

*Huu Tuan Nguyen, †\*<sup>a,b</sup> Shin Young Ryu, †<sup>c</sup> Anh Tuan Duong, <sup>a,b</sup> and Soonil Lee \*<sup>c</sup>*

<sup>a</sup> Phenikaa Research and Technology Institute (PRATI), A&A Green Phoenix Group, 167 Hoang Ngan, Hanoi, 10000, Viet Nam

<sup>b</sup> Faculty of Electrical and Electronic Engineering and Phenikaa Institute for Advanced Study (PIAS), Phenikaa University, Yen Nghia, Ha-Dong District, Hanoi, 10000, Viet Nam

<sup>c</sup> Department of Physics and Department of Energy Systems Research, Ajou University, Suwon 16499, Republic of Korea

---

† These authors contributed equally to this work.

\* All correspondence should be addressed to Dr. Huu Tuan Nguyen ([tuan.nguyenhuu@phenikaa-uni.edu.vn](mailto:tuan.nguyenhuu@phenikaa-uni.edu.vn)) or Prof. Soonil Lee ([soonil@ajou.ac.kr](mailto:soonil@ajou.ac.kr)).

[1] Comparison of  $J$ - $V$  characteristics of QLEDs using semi-log plots

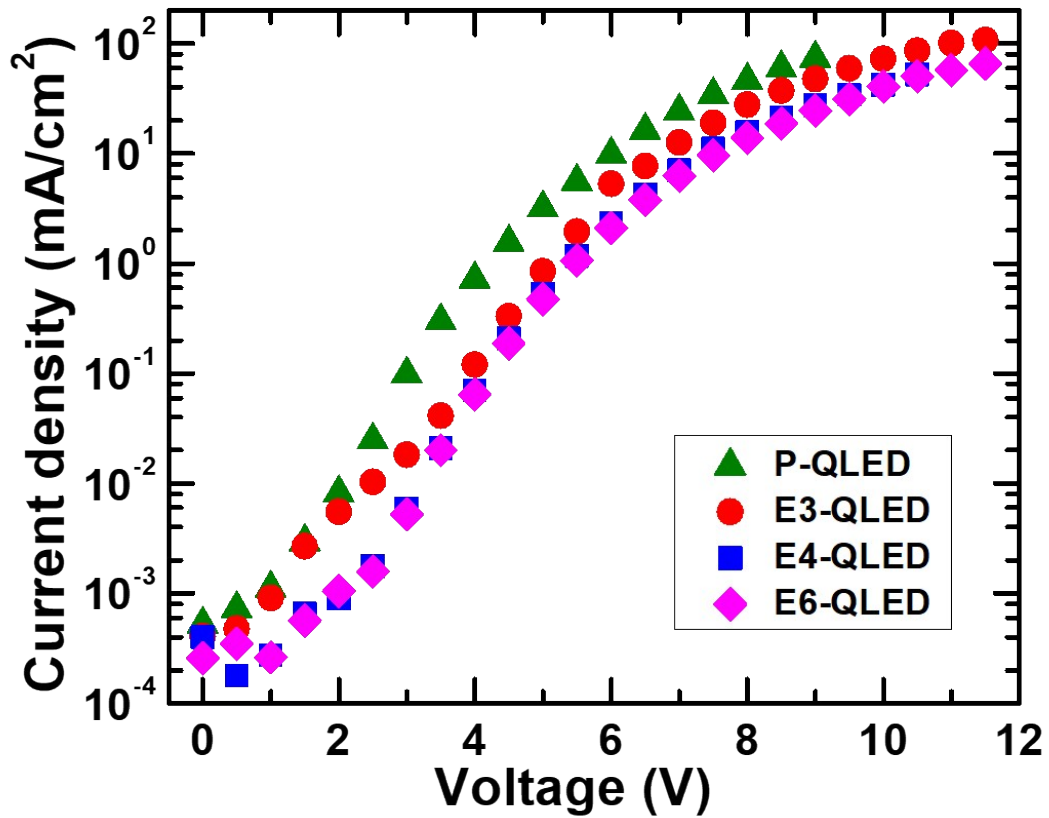

**Figure S1.** Semi-log plots of measured  $J$ - $V$  curves of the device P-QLED and the series of E-QLED devices.

[2] Fitting of  $J$ - $V$  characteristics of QLEDs to a two-diode model

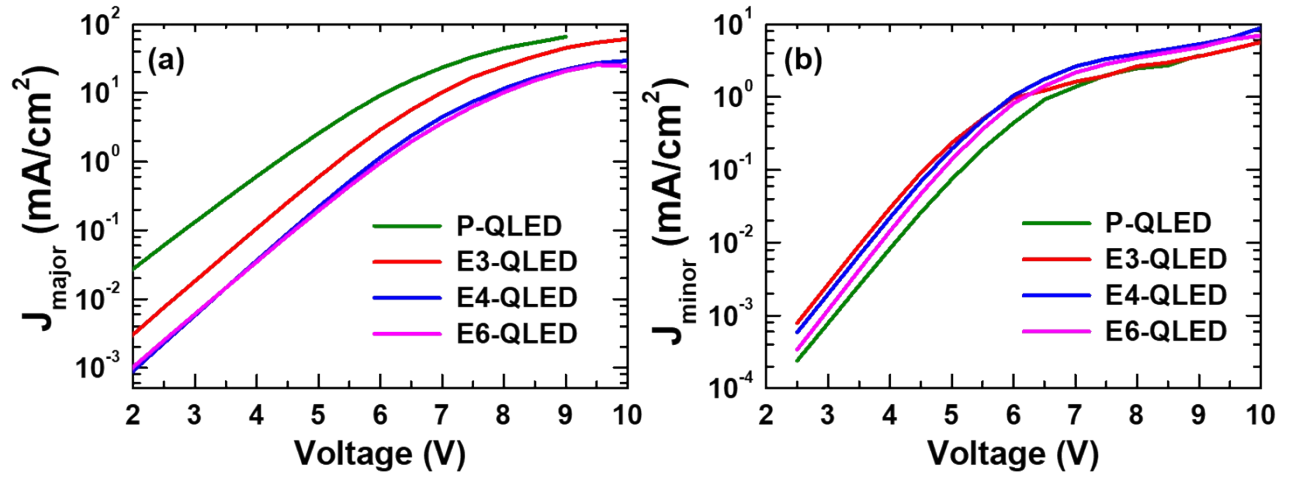

**Figure S2.** Comparison of the majority– (a) and minority–carrier current densities (b) of the QLED devices, which were calculated using the fitting parameters in Table 1. These  $J$ - $V$  curves are identical to those in Figure 3;  $J_{\text{major}}$  and  $J_{\text{minor}}$  correspond to majority– and minority–carrier currents, respectively.

[3] Ratios of the minority- and majority-carrier current densities

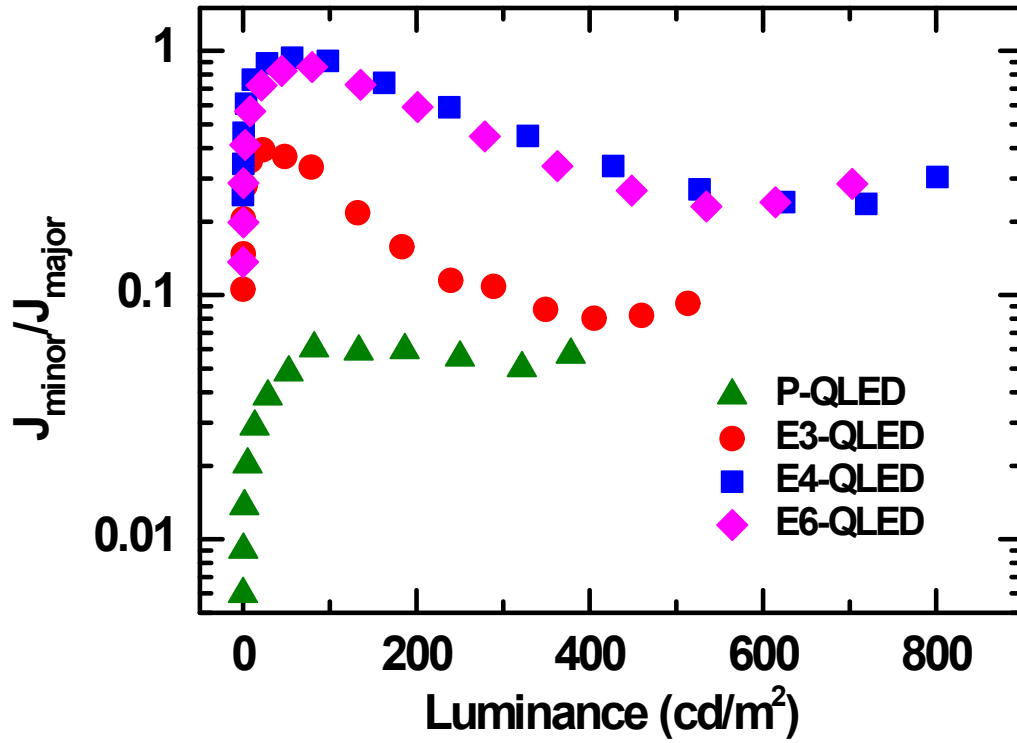

**Figure S3.** Ratios of the minority- and majority-carrier current densities with respect to luminance. The minority- and majority-carrier current densities are identical to those in Figures 3 (in the main text) and S2.

[4] Quantum efficiency of QLED devices

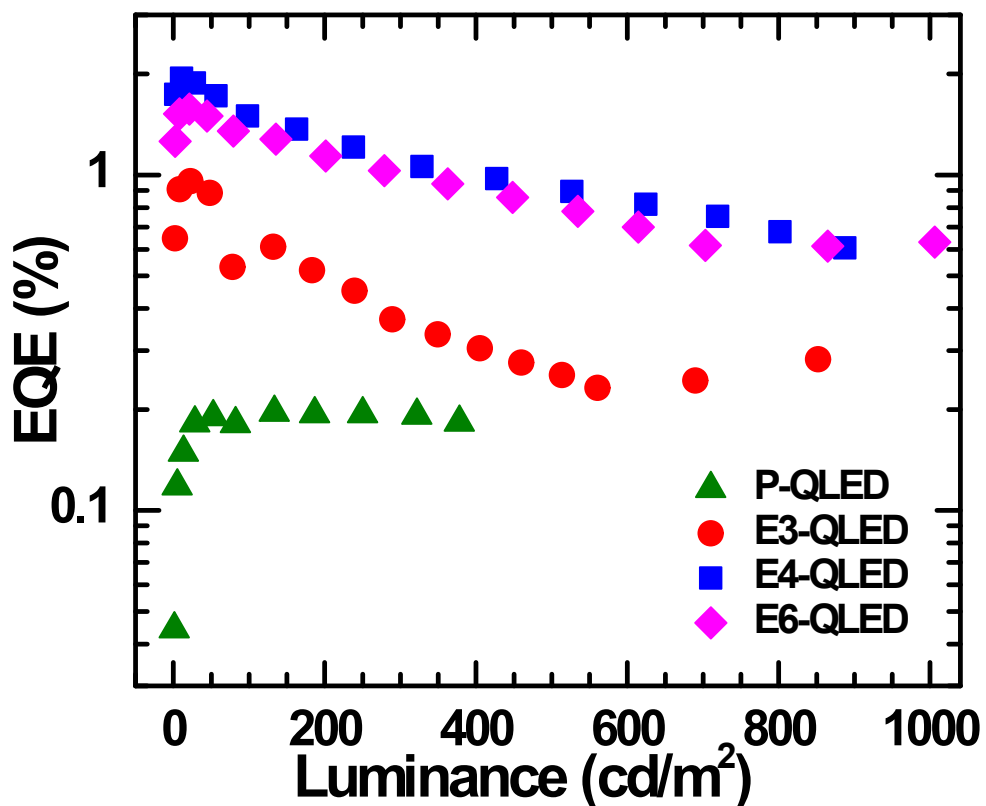

**Figure S4.** Variations of external quantum efficiency (EQE) with respect to luminance. EQEs of the EDT-treated QLEDs are consistently higher than that of the P-QLED device for entire luminance range. The maximum EQEs of the device E3-, E4- and E6-QLED are 0.9, 1.9, and 1.5%, respectively, while that of the P-QLED is only 0.2 %.
